# Supplementary material
Source: PubMed Central journal article supplement (PMC10363184)
Supplement: NIHMS1873884-supplement-supinfo.pdf [file NIHMS1873884-supplement-supinfo.pdf]

## Online-Only Supplementary Materials

### 7 tables, 4 figures

**Table S1.** International Classification of Diseases (ICD) codes to identify cardiovascular events

**Table S2.** Baseline characteristics by antihypertensive medication groups in VA nursing home residents (continued)

**Table S3.** Baseline characteristics by systolic blood pressure levels

**Table S4.** Unadjusted incidence rate (per 1,000 person-years) for cardiovascular events and mortality by antihypertensive medication and SBP groups

**Table S5.** Fully adjusted hazard ratios of SBP levels on transition probabilities by multistate modeling

**Table S6.** Sensitivity analyses of hazard ratios of SBP levels for CV events and mortality by antihypertensive medication groups

**Table S7.** Hazard ratios of SBP levels and changes for CV events and mortality by antihypertensive medication groups

**Figure S1.** Flow chart of study population

**Figure S2.** Diagram of multistate model for CV event

**Figure S3.** Random SBP slopes during follow-up period for CV events (left) and mortality (right)

**Figure S4.** Fully adjusted hazard ratios of SBP levels for CV events and mortality by antihypertensive medication groups

**Table S1. International Classification of Diseases (ICD) codes to identify cardiovascular events**

|                            | <b>ICD-9</b>            | <b>ICD-10</b>      |
|----------------------------|-------------------------|--------------------|
| Myocardial infarction      | 410.x                   | I21.x, I22.x       |
| Stroke                     | 430, 431, 433, 434, 436 | I60, I61, I63, I64 |
| Heart failure exacerbation | 428.x                   | I50.x              |

**Table S2. Baseline characteristics by antihypertensive medication groups in VA nursing home residents (continued)**

|                        | No medication<br>(n=8,718) | 1-2 medication<br>(n=20,544) | ≥3 medication<br>(n=7,372) | P-value |
|------------------------|----------------------------|------------------------------|----------------------------|---------|
| Ethnicity              |                            |                              |                            |         |
| Hispanic               | 562 (6.4)                  | 1,233 (6.0)                  | 375 (5.1)                  | 0.001   |
| Not Hispanic           | 8156 (93.6)                | 19311 (94.0)                 | 6997 (94.9)                |         |
| Region                 |                            |                              |                            |         |
| Pacific                | 1,811 (20.8)               | 3,471 (16.9)                 | 1,104 (15.0)               | <.001   |
| Continental            | 1269 (14.6)                | 2925 (14.2)                  | 1065 (14.4)                |         |
| Midwest                | 2103 (24.1)                | 5544 (27.0)                  | 2165 (29.4)                |         |
| Southeast              | 1509 (17.3)                | 3849 (18.7)                  | 1380 (18.7)                |         |
| North Atlantic         | 2026 (23.2)                | 4755 (23.1)                  | 1658 (22.5)                |         |
| SBP category           |                            |                              |                            |         |
| <110 mmHg              | 1417 (16.3)                | 2212 (10.8)                  | 645 (8.7)                  | <.001   |
| 110~129 mmHg           | 4566 (52.4)                | 9556 (46.5)                  | 2915 (39.5)                |         |
| 130~149 mmHg           | 2,340 (26.8)               | 7,012 (34.1)                 | 2,782 (37.7)               |         |
| ≥150 mmHg              | 395 (4.5)                  | 1764 (8.6)                   | 1030 (14.0)                |         |
| Fall in 30 days        | 2584 (30.3)                | 6206 (30.9)                  | 2187 (30.2)                | 0.441   |
| Statin usage           | 2,223 (25.5)               | 10,074 (49.0)                | 4,632 (62.8)               | <.001   |
| Glucose lowering drugs | 1,586 (18.2)               | 7,622 (37.1)                 | 4,135 (56.1)               | <.001   |
| Diabetes               | 2526 (29.0)                | 9635 (46.9)                  | 4747 (64.4)                | <.001   |
| Osteoarthritis         | 2034 (23.3)                | 5573 (27.1)                  | 2124 (28.8)                | <.001   |
| COPD                   | 1334 (15.3)                | 3667 (17.8)                  | 1544 (20.9)                | <.001   |
| Metastatic Cancer      | 1355 (15.5)                | 2169 (10.6)                  | 469 (6.4)                  | <.001   |

**Notes:** Data was mean (standard deviation) or n (%) and compared using Kruskal-wills or chi-square test. Abbreviation: SBP, systolic blood pressure; COPD, chronic obstructive pulmonary disease.

**Table S3. Baseline characteristics by systolic blood pressure levels**

|                        | SBP levels           |                           |                           |                       | P-value |
|------------------------|----------------------|---------------------------|---------------------------|-----------------------|---------|
|                        | <110mmHg<br>(n=4274) | 110~129 mmHg<br>(n=17037) | 130~149 mmHg<br>(n=12134) | ≥150 mmHg<br>(n=3189) |         |
| Age, years             | 76.9 (8.3)           | 77.6 (8.5)                | 78.2 (8.4)                | 78.4 (8.5)            | <.001   |
| Sex, female            | 71 (1.7%)            | 341 (2.0%)                | 304 (2.5%)                | 106 (3.3%)            | <.001   |
| Race                   |                      |                           |                           |                       |         |
| Black                  | 592 (13.9%)          | 2536 (14.9%)              | 2292 (18.9%)              | 732 (23.0%)           | <.001   |
| White                  | 3,319 (77.7%)        | 12,944 (76.0%)            | 8,742 (72.0%)             | 2,173 (68.1%)         |         |
| Asian                  | 46 (1.1%)            | 235 (1.4%)                | 194 (1.6%)                | 50 (1.6%)             |         |
| American Indian        | 32 (0.7%)            | 129 (0.8%)                | 66 (0.5%)                 | 24 (0.8%)             |         |
| Unknown                | 285 (6.7%)           | 1193 (7.0%)               | 840 (6.9%)                | 210 (6.6%)            |         |
| Ethnicity              |                      |                           |                           |                       |         |
| Hispanic               | 224 (5.2%)           | 944 (5.5%)                | 773 (6.4%)                | 229 (7.2%)            | <.001   |
| Not Hispanic           | 4050 (94.8%)         | 16093 (94.5%)             | 11361 (93.6%)             | 2960 (92.8%)          |         |
| Region                 |                      |                           |                           |                       |         |
| Pacific                | 879 (20.6%)          | 2,959 (17.4%)             | 2,043 (16.8%)             | 505 (15.8%)           | <.001   |
| Continental            | 574 (13.4%)          | 2483 (14.6%)              | 1731 (14.3%)              | 471 (14.8%)           |         |
| Midwest                | 1119 (26.2%)         | 4626 (27.2%)              | 3220 (26.5%)              | 847 (26.6%)           |         |
| Southeast              | 715 (16.7%)          | 3121 (18.3%)              | 2317 (19.1%)              | 585 (18.3%)           |         |
| North Atlantic         | 987 (23.1%)          | 3848 (22.6%)              | 2823 (23.3%)              | 781 (24.5%)           |         |
| Height, cm             | 175.7 (9.1)          | 175.4 (9)                 | 175.1 (9.2)               | 174.6 (8.8)           | <.001   |
| Weight, kg             | 84.2 (22.6)          | 86.5 (22.9)               | 87.2 (22.5)               | 86.1 (21)             | <.001   |
| Smoking status         |                      |                           |                           |                       |         |
| Current                | 1,287 (30.1%)        | 4,454 (26.1%)             | 2,795 (23.0%)             | 764 (24.0%)           | <.001   |
| Former                 | 1706 (39.9%)         | 7084 (41.6%)              | 5230 (43.1%)              | 1337 (41.9%)          |         |
| Never                  | 728 (17.0%)          | 3007 (17.6%)              | 2246 (18.5%)              | 599 (18.8%)           |         |
| Unknown                | 553 (12.9%)          | 2492 (14.6%)              | 1863 (15.4%)              | 489 (15.3%)           |         |
| SBP, mmHg              | 103.3 (5.3)          | 120.2 (5.6)               | 137.7 (5.5)               | 158.4 (8.1)           | <.001   |
| DBP, mmHg              | 61.7 (6.1)           | 67.7 (6.6)                | 72.8 (7.4)                | 77.8 (8.5)            | <.001   |
| ADL                    |                      |                           |                           |                       |         |
| 0                      | 234 (5.5%)           | 1,036 (6.1%)              | 704 (5.8%)                | 208 (6.5%)            | 0.086   |
| 1-14                   | 1876 (43.9%)         | 7548 (44.3%)              | 5468 (45.1%)              | 1347 (42.2%)          |         |
| 15-27                  | 1982 (46.4%)         | 7763 (45.6%)              | 5469 (45.1%)              | 1480 (46.4%)          |         |
| 28                     | 182 (4.3%)           | 690 (4.1%)                | 493 (4.1%)                | 154 (4.8%)            |         |
| Fall in 30 days        | 1150 (27.4%)         | 5091 (30.5%)              | 3746 (31.6%)              | 990 (31.8%)           | <.001   |
| CFS                    |                      |                           |                           |                       |         |
| Cognitively intact     | 1,113 (26.0%)        | 4,292 (25.2%)             | 2,873 (23.7%)             | 754 (23.6%)           | <.001   |
| Mildly impaired        | 1750 (40.9%)         | 6351 (37.3%)              | 4228 (34.8%)              | 1077 (33.8%)          |         |
| Moderately impaired    | 749 (17.5%)          | 3496 (20.5%)              | 2797 (23.1%)              | 737 (23.1%)           |         |
| Severely impaired      | 662 (15.5%)          | 2898 (17.0%)              | 2236 (18.4%)              | 621 (19.5%)           |         |
| Antihypertensives      |                      |                           |                           |                       |         |
| 0                      | 1,417 (33.2%)        | 4,566 (26.8%)             | 2,340 (19.3%)             | 395 (12.4%)           | <.001   |
| 1-2                    | 2212 (51.8%)         | 9556 (56.1%)              | 7012 (57.8%)              | 1764 (55.3%)          |         |
| >=3                    | 645 (15.1%)          | 2915 (17.1%)              | 2782 (22.9%)              | 1030 (32.3%)          |         |
| Statin usage           | 1,662 (38.9%)        | 7,914 (46.5%)             | 5,819 (48.0%)             | 1,534 (48.1%)         | <.001   |
| Glucose lowering drugs | 1,127 (26.4%)        | 5,825 (34.2%)             | 4,949 (40.8%)             | 1,442 (45.2%)         | <.001   |
| Hypertension           | 2955 (69.1%)         | 13552 (79.5%)             | 10565 (87.1%)             | 2911 (91.3%)          | <.001   |
| CVD                    | 2734 (64.0%)         | 11256 (66.1%)             | 8243 (67.9%)              | 2218 (69.6%)          | <.001   |
| Heart Failure          | 1775 (41.5%)         | 5803 (34.1%)              | 3839 (31.6%)              | 1099 (34.5%)          | <.001   |
| Diabetes               | 1583 (37.0%)         | 7474 (43.9%)              | 6078 (50.1%)              | 1773 (55.6%)          | <.001   |
| Osteoarthritis         | 1025 (24.0%)         | 4543 (26.7%)              | 3309 (27.3%)              | 854 (26.8%)           | <.001   |
| COPD                   | 885 (20.7%)          | 3175 (18.6%)              | 1950 (16.1%)              | 535 (16.8%)           | <.001   |
| Kidney disease         | 1658 (38.8%)         | 6551 (38.5%)              | 5345 (44.0%)              | 1712 (53.7%)          | <.001   |
| Metastatic Cancer      | 649 (15.2%)          | 1944 (11.4%)              | 1112 (9.2%)               | 288 (9.0%)            | <.001   |
| Dementia               | 1452 (34.0%)         | 7201 (42.3%)              | 5592 (46.1%)              | 1512 (47.4%)          | <.001   |

**Notes:** Data was mean (standard deviation) or n (%) and compared using Kruskal-wills or chi-square test. Abbreviation: SBP, systolic blood pressure; DBP, diastolic blood pressure; ADL, Activities of daily living; CFS,

Cognitive Function Scale; CVD, cardiovascular disease; COPD, chronic obstructive pulmonary disease.

**Table S4. Unadjusted incidence rate (per 1,000 person-years) for cardiovascular events and mortality by antihypertensive medication and SBP groups**

|                  | No medication<br>(n=8,718) | 1-2 medication<br>(n=20,544) | ≥3 medication<br>(n=7,372) |
|------------------|----------------------------|------------------------------|----------------------------|
| <b>CV events</b> |                            |                              |                            |
| SBP category     |                            |                              |                            |
| <110             | 41.1 (30.7, 53.9)          | 179.8 (160.2, 201)           | 428.3 (368.5, 495.1)       |
| 110~129          | 40 (34.4, 46.3)            | 116 (109, 123.4)             | 272.8 (252.1, 294.7)       |
| 130~149          | 44.3 (36, 53.8)            | 90.5 (83.4, 97.9)            | 212.9 (195.1, 231.9)       |
| ≥150             | 57 (35.3, 87.1)            | 104.8 (89.9, 121.5)          | 212.1 (182.6, 245.1)       |
| Total            | 42.1 (37.8, 46.7)          | 111.7 (106.9, 116.5)         | 250.8 (238.4, 263.7)       |
| <b>Mortality</b> |                            |                              |                            |
| SBP category     |                            |                              |                            |
| <110             | 525.2 (491.9, 560.2)       | 511.7 (484.9, 539.7)         | 557.6 (504.8, 614.5)       |
| 110~129          | 436.5 (420.2, 453.3)       | 383.4 (373, 394.1)           | 400.5 (381, 420.8)         |
| 130~149          | 436.6 (413.9, 460.2)       | 365.1 (353.4, 377.1)         | 338.2 (320.5, 356.5)       |
| ≥150             | 603 (535, 677.2)           | 404.4 (379.6, 430.4)         | 355 (325.1, 387)           |
| Total            | 456.8 (444.6, 469.3)       | 390.7 (383.5, 398.1)         | 380.4 (368.5, 392.6)       |

**Notes:** incidence was per 1,000 person-years. SBP, systolic blood pressure.

**Table S5. Fully adjusted hazard ratios of SBP and DBP levels on transition probabilities by multistate modeling**

|                         | Baseline →<br>CV event | Baseline → Death    | CV event → Death   |
|-------------------------|------------------------|---------------------|--------------------|
| <b>SBP levels, mmHg</b> |                        |                     |                    |
| <b>No medication</b>    |                        |                     |                    |
| <110                    | 0.89 (0.70,1.14)       | 0.99 (0.92,1.06)    | 0.86 (0.63,1.17)   |
| 110~129                 | 0.81 (0.58,1.13)       | 1.09 (1.00,1.19)    | 1.04 (0.68,1.59)   |
| 130~149                 | ref                    | ref                 | ref                |
| ≥150                    | 1.22 (0.76,1.95)       | 1.25 (1.09,1.42) *  | 0.97 (0.53,1.77)   |
| <b>1-2 medication</b>   |                        |                     |                    |
| <110                    | 1.22 (1.10,1.35) **    | 1.02 (0.97,1.07)    | 0.97 (0.85,1.11)   |
| 110~129                 | 1.57 (1.37,1.81) **    | 1.18 (1.10,1.26) ** | 1.14 (0.94,1.37)   |
| 130~149                 | ref                    | ref                 | ref                |
| ≥150                    | 1.12 (0.94,1.32)       | 1.03 (0.96,1.11)    | 1.06 (0.84,1.32)   |
| <b>≥3 medication</b>    |                        |                     |                    |
| <110                    | 1.13 (1.01,1.27) *     | 1.05 (0.96,1.14)    | 1.20 (1.03,1.41) * |
| 110~129                 | 1.50 (1.26,1.77) **    | 1.35 (1.17,1.54) ** | 1.11 (0.86,1.43)   |
| 130~149                 | ref                    | ref                 | ref                |
| ≥150                    | 0.98 (0.83,1.16)       | 1.11 (0.99,1.25)    | 0.98 (0.78,1.23)   |

**Notes:** Data are hazard ratios (95% confidence intervals). SBP, systolic blood pressure. Reference group was SBP of 130~149mmHg. Models adjusted for age, sex, race, height, weight, smoking status, cardiovascular disease, heart failure, activities of daily living, Cognitive Function Scale, statins, glucose lowering drugs, diabetes, osteoarthritis, COPD, kidney disease, metastatic cancer, and dementia (model 2). \* P value<.05 \*\* P value <.001

**Table S6. Sensitivity analyses of hazard ratios of SBP levels for CV events and mortality by antihypertensive medication groups**

| SBP levels, mmHg       | In full cohort <sup>a</sup> |                   | By medication groups at week 4 <sup>b</sup> |                   | Residents with dementia <sup>c</sup> |                   | Residents lived >6 months <sup>d</sup> |                   |
|------------------------|-----------------------------|-------------------|---------------------------------------------|-------------------|--------------------------------------|-------------------|----------------------------------------|-------------------|
|                        | CV events                   | Mortality         | CV events                                   | Mortality         | CV events                            | Mortality         | CV events                              | Mortality         |
| <b>No medication</b>   |                             |                   |                                             |                   |                                      |                   |                                        |                   |
| <110                   | 0.81(0.58,1.13)             | 1.19(1.10,1.29)** | 0.91(0.63,1.29)                             | 1.22(1.11,1.34)** | 0.91(0.53,1.55)                      | 1.10(0.97,1.25)   | 0.85(0.58,1.25)                        | 1.15(1.04,1.28)*  |
| 110~129                | 0.89(0.71,1.12)             | 1.00(0.94,1.07)   | 0.93(0.72,1.21)                             | 1.02(0.95,1.09)   | 0.88(0.62,1.25)                      | 0.95(0.87,1.03)   | 0.90(0.68,1.17)                        | 1.00(0.92,1.08)   |
| 130~149                | ref                         | ref               | ref                                         | ref               | ref                                  | ref               | ref                                    | ref               |
| ≥150                   | 1.28(0.82,1.99)             | 1.31(1.16,1.48)** | 1.28(0.76,2.16)                             | 1.19(1.03,1.39)*  | 0.77(0.35,1.70)                      | 1.20(1.01,1.42)*  | 1.29(0.77,2.15)                        | 1.25(1.07,1.47)*  |
| <b>1-2 medications</b> |                             |                   |                                             |                   |                                      |                   |                                        |                   |
| <110                   | 1.44(1.26,1.65)**           | 1.33(1.25,1.41)** | 1.46(1.27,1.68)**                           | 1.38(1.29,1.47)** | 1.68(1.32,2.12)**                    | 1.27(1.15,1.41)** | 1.29(1.09,1.52)*                       | 1.20(1.11,1.30)** |
| 110~129                | 1.15(1.04,1.27)*            | 1.05(1.01,1.09)*  | 1.15(1.04,1.28)*                            | 1.06(1.01,1.10)*  | 1.25(1.07,1.47)*                     | 1.01(0.95,1.07)   | 1.12(1.00,1.25)*                       | 1.02(0.97,1.07)   |
| 130~149                | ref                         | ref               | ref                                         | ref               | ref                                  | ref               | ref                                    | ref               |
| ≥150                   | 1.16(0.99,1.36)             | 1.08(1.01,1.15)*  | 1.14(0.96,1.35)                             | 1.08(1.01,1.17)*  | 1.40(1.10,1.80)*                     | 1.09(0.99,1.20)   | 1.09(0.91,1.31)                        | 1.10(1.01,1.19)*  |
| <b>≥3 medications</b>  |                             |                   |                                             |                   |                                      |                   |                                        |                   |
| <110                   | 1.37(1.16,1.61)**           | 1.42(1.27,1.58)** | 1.41(1.19,1.69)**                           | 1.48(1.31,1.66)** | 1.60(1.15,2.23)*                     | 1.49(1.21,1.84)** | 1.29(1.05,1.58)*                       | 1.26(1.09,1.46)*  |
| 110~129                | ref                         | ref               | ref                                         | ref               | ref                                  | ref               | ref                                    | ref               |
| 130~149                | 1.06(0.95,1.19)             | 1.09(1.02,1.17)*  | 1.08(0.96,1.22)                             | 1.10(1.02,1.19)*  | 1.22(1.00,1.49)                      | 1.11(0.99,1.25)   | 1.07(0.94,1.21)                        | 1.07(0.98,1.17)   |
| ≥150                   | 0.99(0.84,1.17)             | 1.02(0.92,1.12)   | 1.00(0.85,1.19)                             | 1.04(0.93,1.15)   | 1.04(0.79,1.36)                      | 1.07(0.91,1.24)   | 1.01(0.84,1.22)                        | 0.99(0.88,1.12)   |

**Notes:** Data are hazard ratios (95% confidence intervals). SBP, systolic blood pressure. Reference group was SBP of 130~149mmHg. Models adjusted for age, sex, race, height, weight, smoking status, cardiovascular disease, heart failure, and activities of daily living (model 1). \* P value<.05 \*\* P value <.001

<sup>a</sup> Median follow-up time was 0.51 years (mean 1.07 years) for cardiovascular events and 1.30 years (mean 1.57 years) for mortality in the full cohort.

<sup>b</sup> A total of 34,352 residents with complete information of antihypertensive medication at week 4 were included in this analysis.

<sup>c</sup> A total of 15,757 residents who had dementia at admission were included in this analysis.

<sup>d</sup> A total of 29,977 residents who lived more than 6 months after admission were included in this analysis.



**Table S7. Hazard ratios of SBP levels and changes for CV events and mortality by antihypertensive medication groups**

|                           |                   | CV events           | Mortality           |
|---------------------------|-------------------|---------------------|---------------------|
| <b>No medication</b>      |                   |                     |                     |
| SBP levels,<br>mmHg       | <110              | 0.81 (0.57,1.15)    | 1.31 (1.20,1.43) ** |
|                           | 110~129           | 0.91 (0.71,1.17)    | 1.04 (0.98,1.11)    |
|                           | 130~149           | ref                 | ref                 |
|                           | ≥150              | 1.27 (0.79,2.04)    | 1.27 (1.11,1.44) ** |
| SBP changes               | Decreasing        | ref                 | ref                 |
|                           | Stable/increasing | 1.32 (1.07,1.64) *  | 0.80 (0.76,0.85) ** |
| <b>1 or 2 medications</b> |                   |                     |                     |
| SBP levels,<br>mmHg       | <110              | 1.43 (1.24,1.65) ** | 1.48 (1.38,1.57) ** |
|                           | 110~129           | 1.15 (1.04,1.27) *  | 1.10 (1.05,1.15) ** |
|                           | 130~149           | ref                 | ref                 |
|                           | ≥150              | 1.15 (0.97,1.36)    | 1.05 (0.98,1.13)    |
| SBP changes               | Decreasing        | ref                 | ref                 |
|                           | Stable/increasing | 1.08 (0.99,1.18)    | 0.77 (0.74,0.80) ** |
| <b>≥3 medication</b>      |                   |                     |                     |
| SBP levels,<br>mmHg       | <110              | 1.43 (1.20,1.70) ** | 1.60 (1.43,1.80) ** |
|                           | 110~129           | 1.10 (0.98,1.23)    | 1.16 (1.08,1.25) ** |
|                           | 130~149           | ref                 | ref                 |
|                           | ≥150              | 0.99 (0.84,1.17)    | 0.98 (0.89,1.09)    |
| SBP changes               | Decreasing        | ref                 | ref                 |
|                           | Stable/increasing | 0.94 (0.85,1.05)    | 0.75 (0.70,0.80) ** |

**Notes:** Data are hazard ratios (95% confidence intervals). SBP, systolic blood pressure. SBP levels were 4 categories with reference group of SBP 130~149mmHg. SBP changes were stable/increasing trajectory (random SBP slope  $\geq 0$  mmHg/week) versus decreasing trajectory (reference, random SBP slope  $< 0$  mmHg/week). Models adjusted for age, sex, race, height, weight, smoking status, cardiovascular disease, heart failure, and activities of daily living (model 1). \* P value $<.05$  \*\* P value  $<.001$

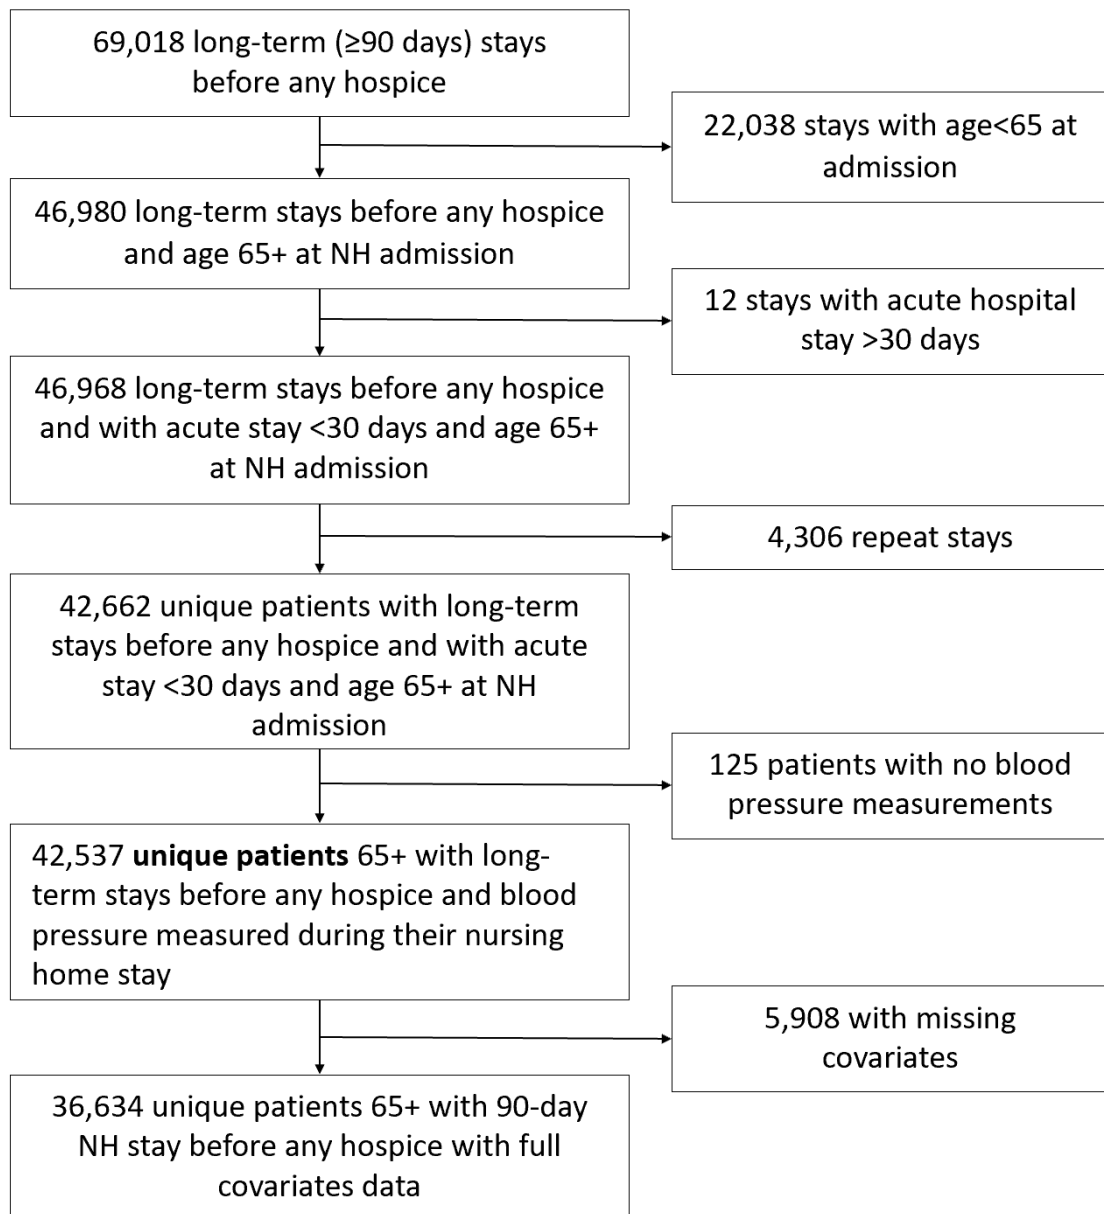

**Figure S1. Flow chart of study population**

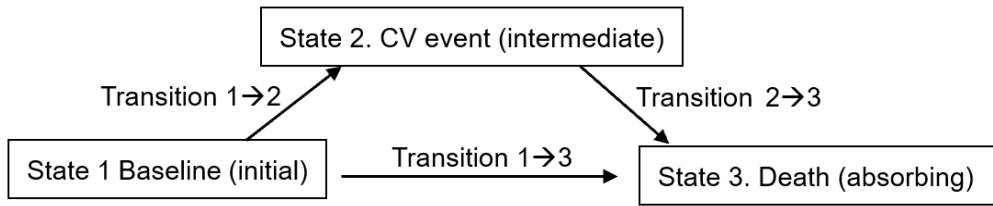

**Figure S2. Diagram of multistate model for CV event**

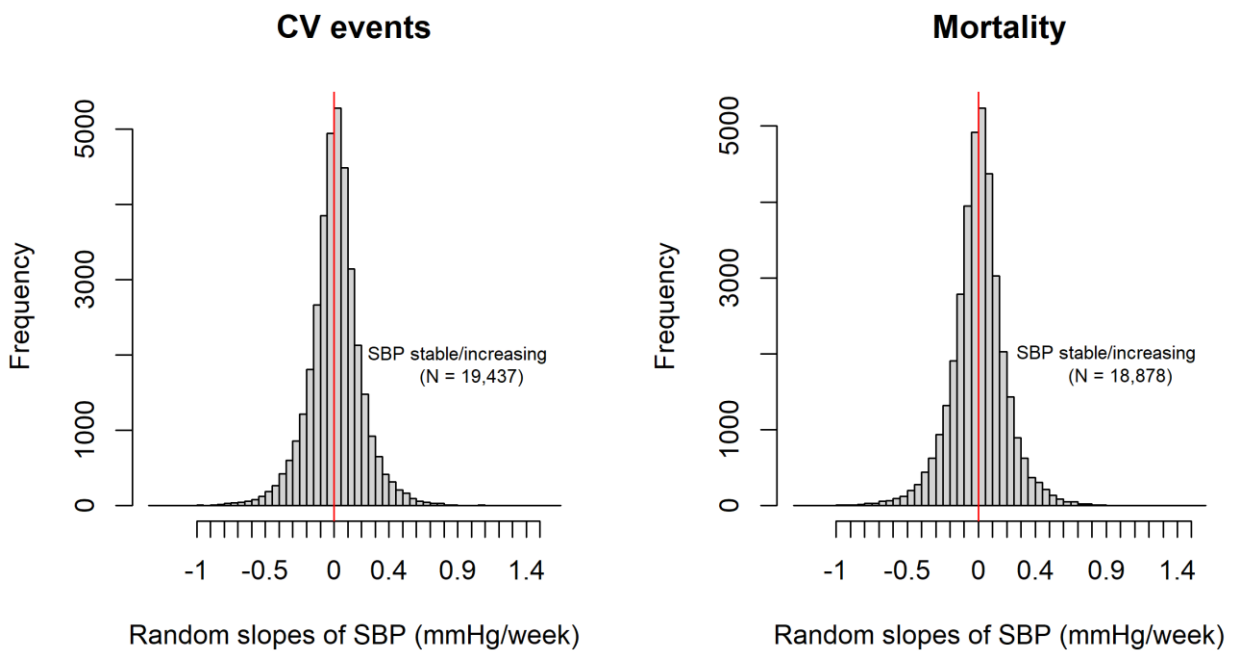

**Figure S3. Random SBP slopes during follow-up period for CV events (left) and mortality (right).** SBP, systolic blood pressure. Slopes were estimated using linear mixed effect modeling. Cut-off value was marked as red vertical line and a slope  $\geq 0$  mmHg/week was defined as a SBP stable/increasing trajectory.

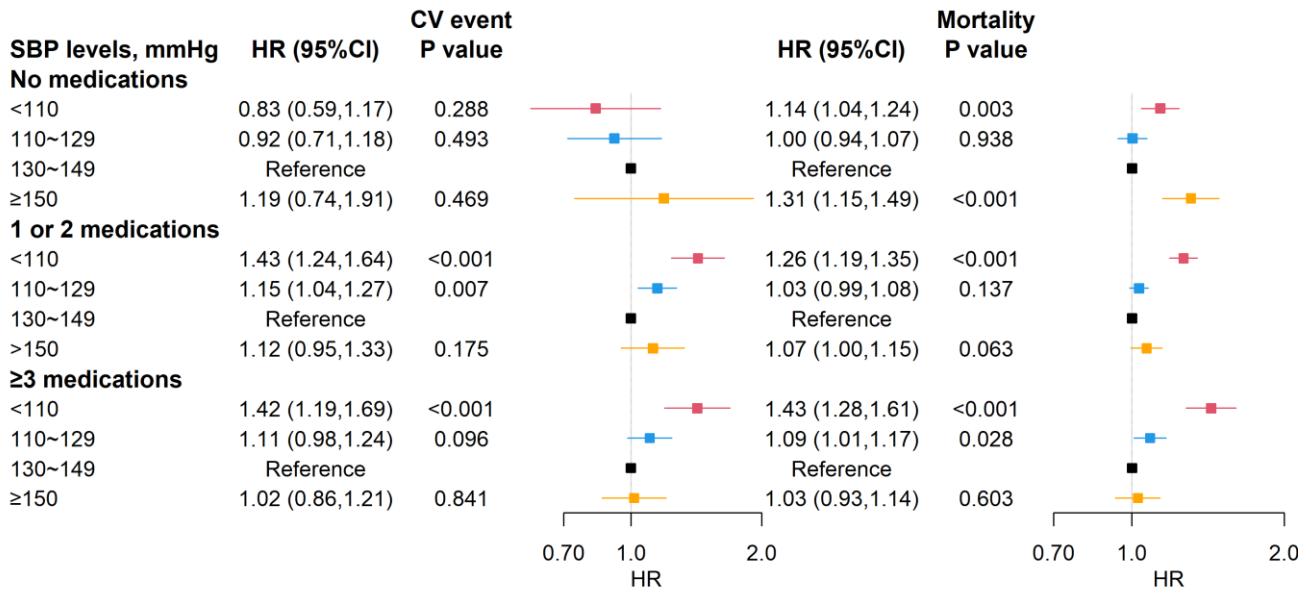

**Figure S4. Fully adjusted hazard ratios of SBP levels for CV events and mortality by antihypertensive medication groups.** SBP, systolic blood pressure. Blood pressure is in units of mmHg. Reference group was SBP of 130~149mmHg. Models adjusted for age, sex, race, height, weight, smoking status, cardiovascular disease, heart failure, activities of daily living, Cognitive Function Scale, statins, glucose lowering drugs, diabetes, osteoarthritis, COPD, kidney disease, metastatic cancer, and dementia (model 2). \* P value<.05 \*\* P value <.001
